# Supplementary material for: Identification of a Severe Acute Respiratory Syndrome Coronavirus-Like Virus in a Leaf-Nosed Bat in Nigeria
Source: PubMed Central journal article supplement — mBio. 2010 Oct 12;1(4):e00208-10. doi: 10.1128/mBio.00208-10 (PMC2975989; doi:10.1128/mbio.00208-10), 2010-10-12
Supplement: mBio00208-10-sf01.pdf [file mBio00208-10-sf01.pdf]

**A**

ZBCoV SSGRRSAIEDLLFNKVVVTADVGFMKK-YEECTGG---SVFKDLDCAQSFNGLKVLPPQMSDAHVGVYTTAAAMG

BtSARS-CoV HKU3 KPTKRFSFIEDLLFNKVTLADAGFMKQ-YGDCCLGD---VSARDLICAQKFNGLTVLPPLLTDEMVAAYTAALVSG

BtSARS-CoV Rf1/2004 KPTKRFSFIEDLLYNKVTLADAGFMKQ-YADCLGG---INARDLICAQKFNGLTVLPPLLTDDMIAAYTAALISG

SARS-CoV KPTKRFSFIEDLLFNKVTLADAGFMKQ-YGECCLGD---INARDLICAQKFNGLTVLPPLLTDDMIAAYTAALVSG

CtSARS-CoV KPTKRFSFIEDLLFNKVTLADAGFMKQ-YGECCLGD---INARDLICAQKFNGLTVLPPLLTDDMIAAYTAALVSG

PRCV KRQYRSAIEDLLFSKVVTSGLGTVDEYKRCCTGGY---DIADLVCAQYYNGIMVLPGVANADKMTMYTASLAGG

HCoV-229E RVAGRSAIEDILFSLVTSGLGTVDADYKCKTKGL---SIADLCAQYYNGIMVLPGVADAERMAMYTGSLIGG

BCoV KVSSRSAIEDLLFSKVKLSDVGFVEA-YNNCTGGAE---IRDLICVQSYNGIKVLPPLLSENQISGYTLAATSA

BtCoV-HKU4 SSSYRSAIEDLLFDKVTIADPGYMQ-YDDCMKQGPQ-SARDLICAQYVSGYKVLPLYDPNMEAYTSSLLGS

BtCoV-HKU9 ATTYRSFSDLLYDKVTRITDPGFMQS-YQKCIDSQWGGSI RDLLCTQTYNGIAVLPPIVSPAMQALYTSSLVGA

IBV SRRKRSLIEDLLFTSVESVGLPTNDA-YKNCTAGPLFFK--DLACAREYNGLLVLPPIITAEMQALYTSSLVAS

SW1 PRDARSTIEDILFDKVTTVGLGTVDADYDKCTKGLSV---ADLVCAQYYNGIMVLPGVADA EK MAMYTGALVGG

BuCoV-HKU11 KAGGRSAIEDLLFNKVVVTNGLGTVDQDYKCSKDLA---IADLVCTQYYNGIMVLPGVVDAQMAMYTASLTGA

**B**

|                     |                                                                               |
|---------------------|-------------------------------------------------------------------------------|
| ZBCoV               | <b>YEKWPWYIWL</b> GFIAGLVVAIALVLVLI-- <b>CCSTSCCSCFKGMCCKK-CCD</b>            |
| BtSARS-CoV HKU3     | <b>YIKWPWYVWL</b> GFIAGLIAIVMTILL-- <b>CCMTSCCCLKGACSCGS-CCK</b>              |
| BtSARS-CoV Rf1/2004 | <b>YIKWPWYVWL</b> GFIAGLVGLFMAIILL-- <b>CYFTSCCSCCKGMCSGS-CCR</b>             |
| SARS-CoV            | <b>YIKWPWYVWL</b> GFIAGLIAIVMTILL-- <b>CCMTSCCCLKGACSCGS-CCK</b>              |
| CtSARS-CoV          | <b>YIKWPWYVWL</b> GFIAGLIAIVMTILL-- <b>CCMTSCCCLKGACSCGS-CCK</b>              |
| PRCV                | <b>YVKWPWYVWL</b> --LIGLVVIFCIPLLLF <b>CCSTGCCG</b> C-IG-CL-GS- <b>CCH</b>    |
| HCoV-229E           | <b>YIKWPWVWL</b> CISVVLIFVVSMLLLC-- <b>CCSTGCCGFFSCFASSIRGCC</b> E            |
| BCoV                | <b>YVKWPWYVWL</b> LIGFAGVAMLVLLFFI-- <b>CCCTGCCGTSC--FKKCG-GCCD</b>           |
| BtCoV-HKU4          | <b>YNKWPWYVWL</b> GFIAGLVALLLCVFFL-- <b>LCCTGCCGTSC</b> CLGKMK <b>CKN-CCD</b> |
| BtCoV-HKU9          | <b>TIKWPWYVWL</b> AMIAGIVGLVLAVIML-- <b>MCMTNCCSCFKGMCDCRR-CCG</b>            |
| IBV                 | <b>YIKWPWYVWL</b> AIAFATIIIFILILGWV-- <b>FFMTGCCGC-----CCG</b>                |
| SW1                 | <b>YSKWPWVWL</b> IIIVLCFAAFCLLVFWI-- <b>FICTGCCGCCN-----CCG</b>               |
| BuCoV-HKU11         | <b>YLKWPWYIWL</b> AIFLAIAAFACIIVTI-- <b>FLCTGCCGCF-----GCCG</b>               |

\*\*\*\*\* \*\*
