# Supplementary material for: Identification of a Severe Acute Respiratory Syndrome Coronavirus-Like Virus in a Leaf-Nosed Bat in Nigeria
Source: PubMed Central journal article supplement — mBio. 2010 Oct 12;1(4):e00208-10. doi: 10.1128/mBio.00208-10 (PMC2975989; doi:10.1128/mbio.00208-10), 2010-10-12
Supplement: mBio00208-10-sf02.pdf [file mBio00208-10-sf02.pdf]

ORF 6

ZBCoV UGUCCACUGAAGUUACUGUUGCUACAGCUCGCACUCUCUCCUACUACAAGCUCAGUUGGAGGAAAGAGGCGGGU--GCAGGAA**AU--G**

Bt SARS-CoV HKU-3 UGCCAAAAGAGAUUACGGUGGCUACAUCACGAACGCUUUCUUAUUACAA----AUUAGGAGCGUCGCAGCGUGUAGGCACUGAUUCAG

SARS-CoV UGCCAAAAGAGAUACUGUGGCUACAUCACGAACGCUUUCUUAUUACAA----AUUAGGAGCGUCGCAGCGUGUAGGCACUGAUUCAG

ZBCoV GUGUCGCUCUGUAUGCGCGCUACAAGGUUGGAAACCAU----CGUGUGCCCAACUCGCGCUCAUCA--GACGAUAAUGAU-----

Bt SARS-CoV HKU-3 GUUUUGCUGCAUACAACCGCUACCGAAUUGGAAACUACAAACUAAAUACAGACCAUUCAGGUAGCAACGACAAUAUUGCUUUGCUAGU

SARS-CoV GUUUUGCUGCAUACAACCGCUACCGUAUUGGAAACUAAAAUAAAUACAGACCAGCCGGUAGCAACGACAAUAUUGCUUUGCUAGU

M

ORF 7

ZBCoV -----GAUG-UUCUGCUACUUG-----UAUCG**UA--AGAG**-----AUCACGAA-----CAGA**AAU**

Bt SARS-CoV HKU-3 ACAG**UAA**GUGACAACAG**AUG**UUUCAUCUAGUUGACUCCAGGUUACAAUAGCAGAGAUUUGAUUAUCAUUAUGAAAACUUUCAGGGU

SARS-CoV ACAG**UAA**GUGACAACAG**AUG**UUUCAUCUUGUUGACUCCAGGUUACAAUAGCAGAGAUUUGAUUAUCAUUAUGAGGACUUUCAGGAU

M

6

ORF 6

ZBCoV **GG--**AUUU-UAAC----AAAUUAUACACAAUUC**UA-AGUG**-----UUGUUU-----UAACUUA-UUGCAUGUUUCUGACUAAUGU

Bt SARS-CoV HKU-3 UGCCAUUUGGAACCUUGACAUAUAUAAGUCAAUAGUGAGACAAUUAUUUAAGCCUCUAACUAAGAAGAAUUAUUCAGAGUUAGAU

SARS-CoV UGCUAUUUGGAACCUUGACGUUAUAUAAGUCAAUAGUGAGACAAUUAUUUAAGCCUCUAACUAAGAAGAAUUAUUCGGAGUUAGAU

ZBCoV -AUUAAUAACC---GUAGUCAGAAGUU---UAAUUC-----AUUA--CUGUUCUCUGAUAU--AUAGUUUUAGAAA----ACA  
 Bt SARS-CoV HKU-3 GAUGAAGAACCUAUGGAGUUAGAUUAUCCA **UAA**AACGAAC **AUG**AAAAUUAUUCUCUUCU-UGACAUUGAUAGCGCUUGCAACUUGUGA  
 SARS-CoV GAUGAAGAACCUAUGGAGUUAGAUUAUCCA **UAA**AACGAAC **AUG**AAAAUUAUUCUCUUC-CUGACAUUGAUUGAUUUACAUCUUGCGA  
 6 7a

ORF 8

ZBCoV AUUCUA-CACGAACAACA-----AGAACA **AUG**CCUGU-----GAUGGGCG--GACGCUCAGG-----ACGCGG-----ACC-  
 Bt SARS-CoV HKU-3 GUUAUAUCAUUUUCAGGAGUGUGUUAGGGGUACGACUGUACUACUAAAAGAACCUUGCCCAUCAGGAACAUUGAGGGCAAUUCACCA  
 SARS-CoV GCUAUAUCACUUCAGGAGUGUGUUAGAGGUACGACUGUACUACUAAAAGAACCUUGCCCAUCAGGAACAUUCAGGGCAAUUCACCA

ORF 7

ZBCoV UUCAUCUUGUUGCUU-----CUGAUCCUAGCAU---CCCUGACCUACCU-GU-~~CUA~~UUGGUGCAUCACAC-CAU  
 Bt SARS-CoV HKU-3 UUUCACCCUCUUGCUGAUAAUAAUUUGCACUAACUUGCUCUAGCACACAUUUUGCUUUUGCUUGUGCUGACGGUACUAGACACACCU  
 SARS-CoV UUUCACCCUCUUGCUGACAAUAAUUUGCACUAACUUGCACUAGCACACACUUUGCUUUUGCUUGUGCUGACGGUACUCGACAUACCU

ZBCoV AACAG-----AGAUAA----UGCCGAGCAUAUGGACCCG-----GUCGAUCAAAGACUUUUGAGACCA-UUGUCGUCA  
 Bt SARS-CoV HKU3 AUCAGCUUCGUGCAAGAUCAGUUUACCAAACUUUUCUUCAGACAAGAGGAAGUUUAUCAAGAG-CUCUACUCACCACUUUUCUCA  
 SARS-CoV AUCAGCUGCGUGCAAGAUCAGUUUACCAAACUUUUCUUCAGACAAGAGGAGGUUCAACAAGAG-CUCUACUCGCCACUUUUCUCA

ZBCoV UUAUCCUUG--UUACUGUCU----UAAUUUUCAGCACUAUU-----GUAAAUG----CACUCUUAU-----GUCG  
 Bt SARS-CoV HKU3 UUGUUGCUGCAUUAGUAUUUAUAUACUUUGCUUCACCAUUAAGAGAAAGACAGAAAUGAAUGAGCUCACUUAAUUGACUUCUAUUUG  
 SARS-CoV UUGUUGCUGCUCUAGUAUUUUUAUACUUUGCUUCACCAUUAAGAGAAAGACAGAAAUGAAUGAGCUCACUUAAUUGACUUCUAUUUG

7b/7a

ZBCoV CGCUGUGUUGC--UUAUGG---UUCUUGUCUUGA--ACGCU-----GAUGCUG-----CAC-----CCAC-AUAUAGAGUGACACG  
 Bt SARS-CoV HKU3 UGCUUUUUAGCCUUUCUGCUAUUCCUUGUUUUAAUUAUGCUUCUUAUAAUUUUGGUUCUCGCUUGAGAUUCAGGACAUAGA-AGAACCU  
 SARS-CoV UGCUUUUUAGCCUUUCUGCUAUUCCUUGUUUUAAUUAUGCUUUAUUAUUUUGGUUUUCACUCGAAAUCCAGGAUCUAGA-AGAACCU

ZBCoV UUUACCAA---CUGAA-GUGC-UGAA--UACUGAUUGUGUCUCCAACACUAUCCCGUGCUUGGAUGCUUUUACAGUCAUUGGUUUUUG  
 Bt SARS-CoV HKU3 UGUAAACAAAGUCUAAACGAACAUGAAACUUCUCAUUGUUUUGGACUCUAGCAUCA-GUGUACUGCUUCCACAGAGAAUGCAGCAUA

8

SARS-CoV UGUACCAAAGUCUAAACGAACAUGAAACUUCUCAUUGUUUU--GACUUGUAU-UUCU-CUAUGCAG-UUGCAUAUGCACUGUAG--UA

7b

8a

ZBCoV CAUUACUGGCC-----CUACACCUC---UGACU-AAUA-CUAUG-----CGUUACGAUGUGG-----  
 Bt SARS-CoV HKU3 CAAGAGUGUUGUGAAAAUCAACCCUACCAAUUGAAGACCCAUGUCCAUAUACAUUACUAUUCGGACUGGUUUUAUAAAAUUGGAUCUA  
 SARS-CoV CAGCGCUGUGCAUCUAAUAAACCUCAUGUGCUUGAAGAUCUUG-----UAA-----GGUACA

8b

ZBCoV -ACCAUUGGGUUG-UUGUUA-AGCAACUC----CAUUUCCCUGAGUGGCAAGUCCCACCCUCCAUCGUAAA---GACACCACAAAUGA  
 Bt SARS-CoV HKU3 GAAAAUCGGCUCGCCUCGUACAAUUGUGCGAAGGUGAUUACGGACGAAGAAUCCAAUUCAUUAUGAGAUGUUUGGCA--AUUACACU  
 SARS-CoV -ACACUAGGGGUAAUACUUUAUAGCACUGCUUGGCUUUGUGCUCUAGGAAAGGUUUUACC--UUUUCAUAGA--UGGCA-CACUAUGGU

8a

ZBCoV -CCUCAGGUG----CCGAAAGUU-CCACCAACUUUUGGAUGCAUUUGGUAUG-AAGCAUUGCUC--UGUUCGUCGGGCGCUGCGC  
 Bt SARS-CoV HKU3 AUCUC--CUGUGAACCACUAGAG--AUAAAUUGUCAGGCUCCACCAGUAGGUAGUCUAAUCGUUCGUUGUUCAUACGAUUAUGACU  
 SARS-CoV -UCAACAUGCACACCUAAUGUUACUAUCAACUGUCAAGAUCAGCUGGUGGUGCGCUUAUAGCUAGGUGUUGGUACCUUCAUGAAG

N

ZBCoV UCGAAGAAAUUG-----UCAAGAACUAAAA-----CAAUU-UAAACGAAC---UUUAUC---CUCAAGAUG---CGAGCCA  
 Bt SARS-CoV HKU3 UUGUUGAGCAUCAUGACGUUCGUG---UUGUUCUAGAUUUCAUC--UAAACGAACAAACUAAAAUGUCUGAUAAUGGACCCCA---A  
 SARS-CoV GUCACCAAACUGCUGCAUUUAGAGACGUACUUGUUGUUUUAAA---UAAACGAACAAAUUAAAUGUCUGAUAAUGGACCCCAAUCA

8

N

8b

N

ORF 8

ZBCoV A--CAAGGCAAU-----CGCA-UACGCUUUGAGGAC---CAGAGUU  
 Bt SARS-CoV HKU3 AGUCAACGUAGUGCCCCCGCAUUACAUUUGGUGGACCCGCAGA-UU  
 SARS-CoV AACCAACGUAGUGCCCCCGCAUUACAUUUGGUGGACCCACAGA-UU
