# Supplementary material for: Identification of a Severe Acute Respiratory Syndrome Coronavirus-Like Virus in a Leaf-Nosed Bat in Nigeria
Source: PubMed Central journal article supplement — mBio. 2010 Oct 12;1(4):e00208-10. doi: 10.1128/mBio.00208-10 (PMC2975989; doi:10.1128/mbio.00208-10), 2010-10-12
Supplement: mBio00208-10-sf03.pdf [file mBio00208-10-sf03.pdf]

# A

ZBCoV AAACAC**CGAGGCCACGCCGAGUAGGAUCGAGGGUACAG**UGUUA  
BtSARS-CoV HKU3 UUUCAC**CGAGGCCACGCCGAGUACGAUCGAGGGUACAG**UGAAU  
SARS-CoV UUUCAU**CGAGGCCACGCCGAGUACGAUCGAGGGUACAG**UGAAU  
CtSARS-CoV UUUCAU**CGAGGCCACGCCGAGUACGAUCGAGGGUACAG**UGAAU  
IBV CAGUGC**CGGGGCCACGCCGAGUACGAUCGAGGGUACAG**CACUA  
TuCoV CAGUGC**CGGGGCCACGCCGAGUACGAUCGAGGGUACAG**CACAA  
BuCoV AUGUGC**CGAGGCCACGCCGAGUACGAUCGAGGGUACAG**CACAA  
MuCoV AUGUGU**CGAGGCCACGCCGAGUACGAUCGAGGGUACAG**CACAA  
ThCoV AUAUGC**CGAGGCCACGCCGAGUACGAUCGAGGGUACAG**CAUAA  
HAsV-PS UUGC**CGAGGCCACGCCGAGUAGGAUCGAGGGUACAG**CGCUA  
ERBV ACUCGC**CGAGGCCACGCCGAGUAGGACCGAGGGUACAG**CGAGU

\*\* \*\*\*\*\* \*\*\*\*\* \*\*\*\*\*

# B

ZBCoV                   AAACACCGAGGCCACGCCGAGUAGGAUCGAGGGUACAGUGUUAAAAGCCAGUUCAAGAAUAACUAGACCGAGGCCACGCCGAGUAGGAU

BtSARS-CoV HKU3 UUUCACCGAGGCCACGCCGAGUACGAUCGAGGGUACAGU-----GAAUA-----AUGC----UAGG--

SARS-CoV               UUUCAUCGAGGCCACGCCGAGUACGAUCGAGGGUACAGU-----GAAUA-----AUGC----UAGG--

CtSARS-CoV           UUUCAUCGAGGCCACGCCGAGUACGAUCGAGGGUACAGU-----GAAUA-----AUGC----UAGG--

                          \*\* \*\*\*\*\*

ZBCoV                   CGAGGGUACAGUUACAAGUCUUGCUGGAAGAGCC

BtSARS-CoV HKU3    -GAGAG--CUGCCUAUA-----UGGAAGAGCC

SARSCoV               -GAGAG--CUGCCUAUA-----UGGAAGAGCC

CtSARSCoV            -GAGAG--CUGCCUAUA-----UGGAAGAGCC

**c**

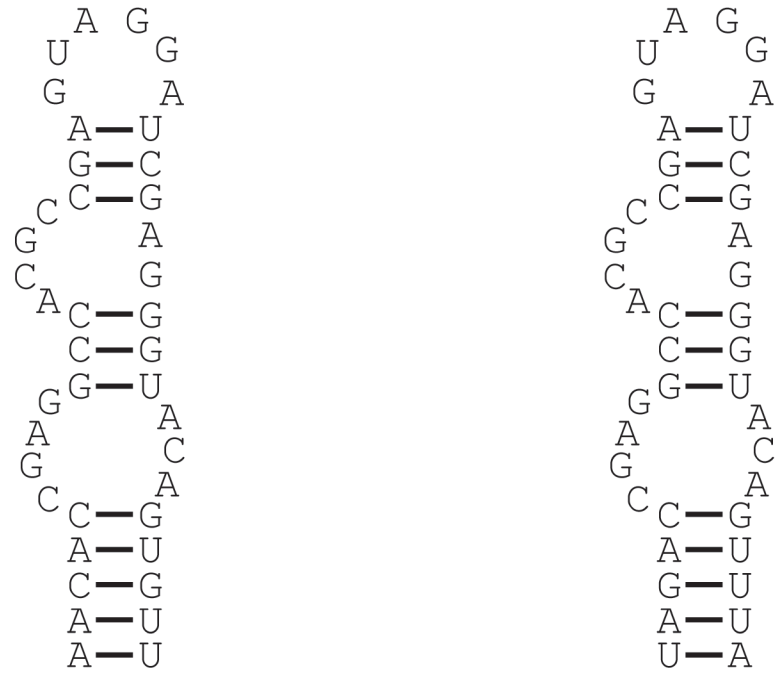

UAA (157) AGAGCCCCCAAAGAAUA AAAAGCCAGUUCAAGAAUAAC CAAGUCUU
