# Supplementary material for: Identification of a Severe Acute Respiratory Syndrome Coronavirus-Like Virus in a Leaf-Nosed Bat in Nigeria
Source: PubMed Central journal article supplement — mBio. 2010 Oct 12;1(4):e00208-10. doi: 10.1128/mBio.00208-10 (PMC2975989; doi:10.1128/mbio.00208-10), 2010-10-12
Supplement: mBio00208-10-st08.pdf [file mBio00208-10-st08.pdf]

|                     | S           | ORF 3      | ORF 3b | E          | M          | ORF 6      | ORF 7      | ORF 7b | ORF 8/8a   | ORF 8b | N           | ORF 9b | Length between M and N |
|---------------------|-------------|------------|--------|------------|------------|------------|------------|--------|------------|--------|-------------|--------|------------------------|
| ZBCoV               | <b>3897</b> | <b>750</b> | N/A    | <b>237</b> | <b>729</b> | <b>147</b> | <b>237</b> | N/A    | <b>654</b> | N/A    | <b>1260</b> | N/A    | <b>788</b>             |
| BtSARS-CoV HKU3     | 3729        | 825        | N/A    | 231        | 666        | 192        | 369        | 135    | 366        | N/A    | 1266        | 294    | 1095                   |
| BtSARS-CoV Rm1/2004 | 3726        | 825        | N/A    | 231        | 666        | 192        | 369        | 135    | 366        | N/A    | 1263        | 294    | 1095                   |
| BtSARSCoV Rp3/2004  | 3726        | 825        | N/A    | 231        | 666        | 192        | 369        | 135    | 366        | N/A    | 1266        | 294    | 1095                   |
| BtSARS-CoV Rf1/2004 | 3726        | 825        | 345    | 231        | 666        | 192        | 369        | 135    | 369        | N/A    | 1266        | 294    | 1085                   |
| SARS-CoV            | 3768        | 825        | 465    | 231        | 666        | 192        | 369        | 135    | 120        | 255    | 1269        | 297    | 1056                   |
| CtSARS-CoV SZ3      | 3768        | 825        | 465    | 231        | 666        | 192        | 369        | 135    | 369        | N/A    | 1269        | 297    | 1085                   |

N/A: non applicable
