# Supplementary material for: Identification of a Severe Acute Respiratory Syndrome Coronavirus-Like Virus in a Leaf-Nosed Bat in Nigeria
Source: PubMed Central journal article supplement — mBio. 2010 Oct 12;1(4):e00208-10. doi: 10.1128/mBio.00208-10 (PMC2975989; doi:10.1128/mbio.00208-10), 2010-10-12
Supplement: mBio00208-10-st09.pdf [file mBio00208-10-st09.pdf]

|                        | ZBCoV | BtSARS-CoV<br>HKU-3 | BtSARS-CoV<br>Rm1/2004 | BtSARS-CoV<br>Rp3/2004 | BtSARS-CoV<br>RF1/2004 | SARS-CoV  | CtSARS-CoV<br>SZ3 |
|------------------------|-------|---------------------|------------------------|------------------------|------------------------|-----------|-------------------|
| ZBCoV                  |       | <b>22.2</b>         | <b>21.4</b>            | <b>23</b>              | <b>22</b>              | <b>22</b> | <b>21.6</b>       |
| BtSARS-CoV<br>HKU-3    | 32.7  |                     | 93.4                   | 94.2                   | 85.4                   | 81.8      | 81.4              |
| BtSARS-CoV<br>Rm1/2004 | 32    | 97.8                |                        | 98.5                   | 86.1                   | 83.6      | 83.2              |
| BtSARS-CoV<br>Rp3/2004 | 35.2  | 98.2                | 99.6                   |                        | 86.9                   | 83.6      | 83.2              |
| BtSARS-CoV<br>RF1/2004 | 31.1  | 94.9                | 94.5                   | 94.9                   |                        | 86.1      | 85.8              |
| SARS-CoV               | 33.8  | 91.6                | 92.7                   | 92.3                   | 92                     |           | 98.2              |
| CtSARS-CoV<br>SZ3      | 31.4  | 91.6                | 92.7                   | 92.3                   | 92                     | 98.5      |                   |
