# Supplementary figures and images for: Identification of a Severe Acute Respiratory Syndrome Coronavirus-Like Virus in a Leaf-Nosed Bat in Nigeria
Source: PubMed Central journal article supplement — mBio. 2010 Oct 12;1(4):e00208-10. doi: 10.1128/mBio.00208-10 (PMC2975989; doi:10.1128/mbio.00208-10), 2010-10-12

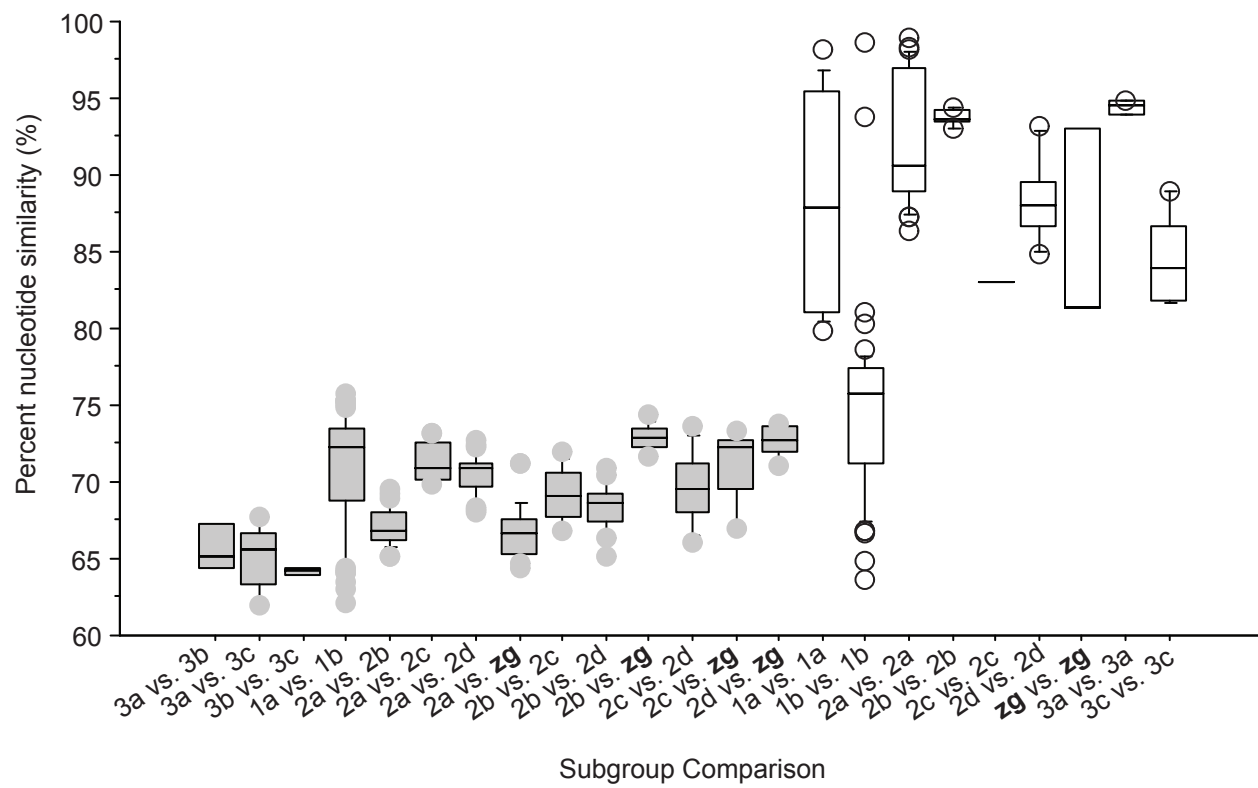

Supplement: mBio00208-10-sf04.pdf [file mBio00208-10-sf04.pdf]
